# Supplementary material for: Shear Stress Regulates TRPV4 Channel Clustering and Translocation from Adherens Junctions to the Basal Membrane
Source: PubMed Central journal article supplement (PMC5698423; doi:10.1038/s41598-017-16276-7), 2017-11-21
Supplement: 41598_2017_16276_MOESM1_ESM.pdf [file 41598_2017_16276_MOESM1_ESM.pdf]

# **Shear Stress Regulates TRPV4 Channel Clustering and Translocation from Adherens Junctions to the Basal Membrane**

Sara Baratchi<sup>1</sup>, Markus Knoerzer<sup>2</sup>, Khashayar Khoshmanesh<sup>2</sup>, Arnan Mitchell<sup>2</sup>,  
Peter McIntyre<sup>1</sup>

<sup>1</sup> School of School of Health and Biomedical Sciences, RMIT University, VIC 3083, Australia

<sup>2</sup> School of Engineering, RMIT University, VIC 3001, Australia

Corresponding author:

Dr. Sara Baratchi, School of Health and Biomedical Sciences, RMIT University, Melbourne,  
Australia

Email: [sara.baratchi@rmit.edu.au](mailto:sara.baratchi@rmit.edu.au)

## Supplementary 1

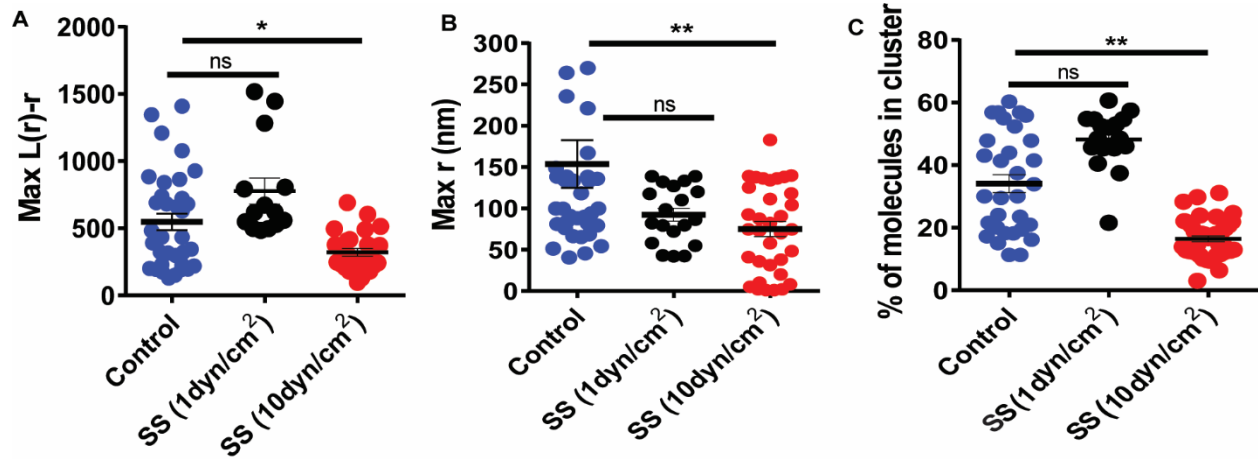

**Supplementary 1** Stimulation of HUVECs with a low shear stress of 1 dyn/cm<sup>2</sup> did not change the spatial distribution of TRPV4. Peaks of Ripley's K-function plots were analyzed for the maximum values of  $L(r)-r$  (A),  $r_{\max}$  (B) and % of molecules in cluster (C) for multiple cells.

## Supplementary 2

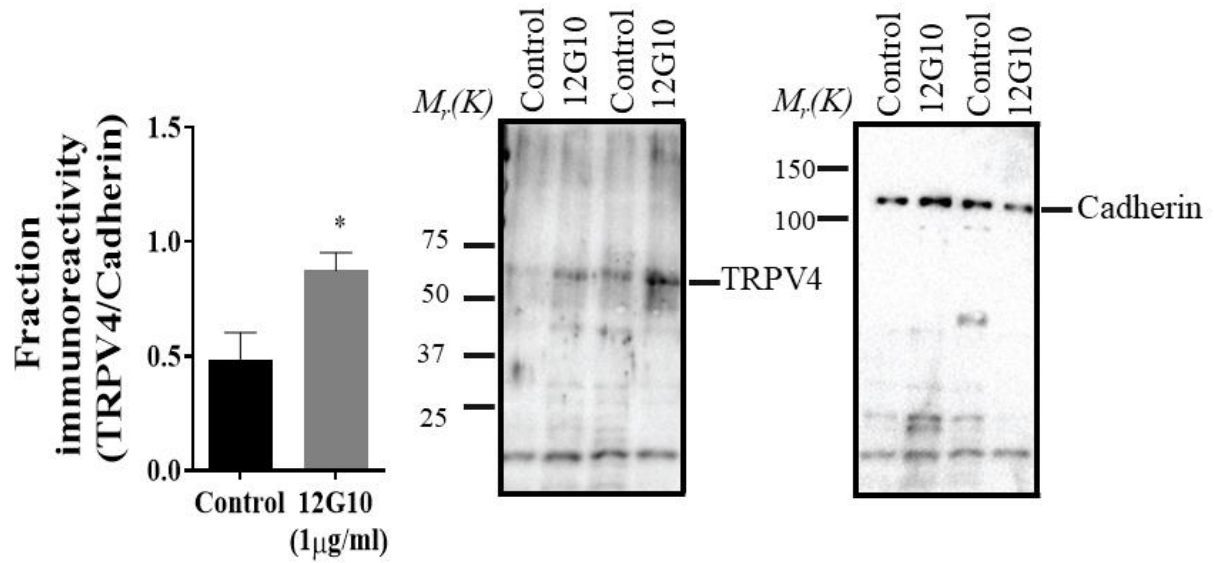

**Supplementary 2** Cell surface biotinylation assay showing that activation of  $\alpha 5\beta 1$  integrin with anti- $\beta 1$  integrin antibody (12G10) increases the cell surface expression of TRPV4 in HUVECs.
